# Supplementary material for: Dissecting Individual Interactions between Pathogenic and Commensal Bacteria within a Multispecies Gut Microbial Community
Source: PubMed Central journal article supplement (PMC8546675; doi:10.1128/msphere.00013-21), 2021-03-24

Suppl Figure 4

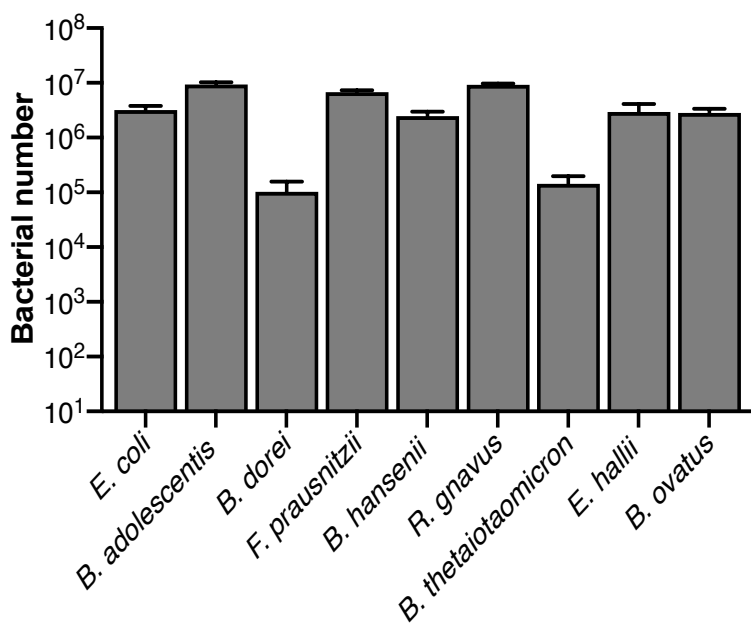

Supplement: msphere.00013-21-sf004.pdf [file msphere.00013-21-sf004.pdf]
