# Supplementary material for: Dissecting Individual Interactions between Pathogenic and Commensal Bacteria within a Multispecies Gut Microbial Community
Source: PubMed Central journal article supplement (PMC8546675; doi:10.1128/msphere.00013-21), 2021-03-24
Supplement: msphere.00013-21-sf006.pdf [file msphere.00013-21-sf006.pdf]

# Suppl Figure 6

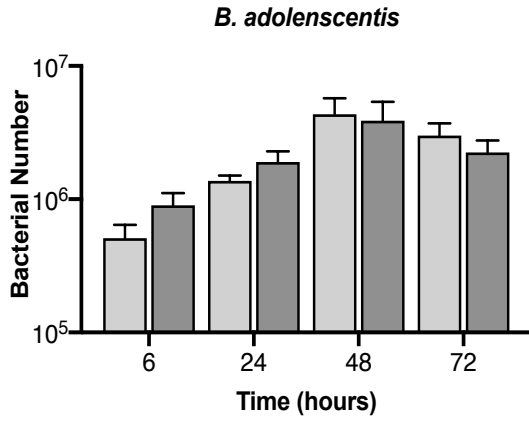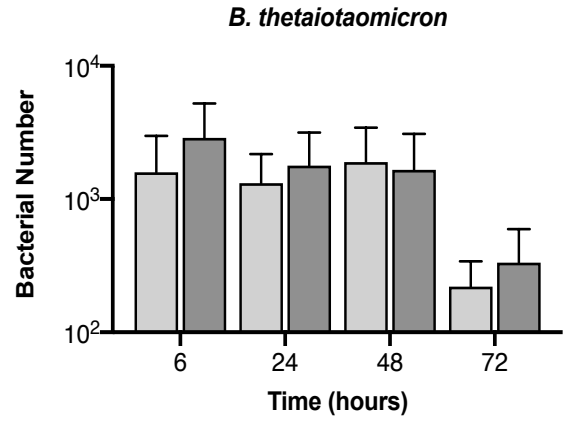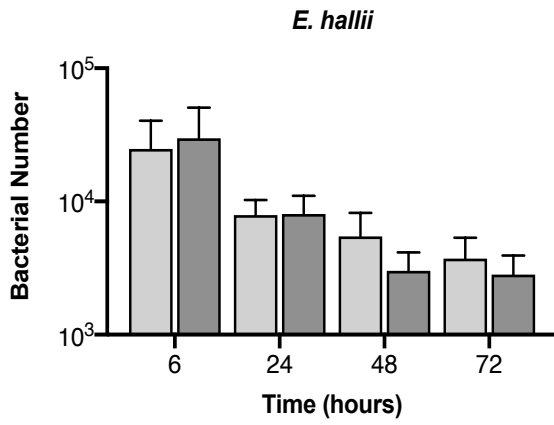

Legend:

- 9-Species Microbiota
- 9-Species Microbiota & *C. difficile*
