# Supplementary material for: Dissecting Individual Interactions between Pathogenic and Commensal Bacteria within a Multispecies Gut Microbial Community
Source: PubMed Central journal article supplement (PMC8546675; doi:10.1128/msphere.00013-21), 2021-03-24
Supplement: msphere.00013-21-st001.pdf [file msphere.00013-21-st001.pdf]

**Table S1A**

| <b>Species</b>             | <b>Slope</b> | <b>Y-intercept</b> | <b>R<sup>2</sup></b> | <b>Primer efficiency (%)</b> |
|----------------------------|--------------|--------------------|----------------------|------------------------------|
| <i>B. dorei</i>            | -3.269       | 14.26              | 0.9994               | 102.26                       |
| <i>B. fragilis</i>         | -3.230       | 22.20              | 0.9919               | 107.90                       |
| <i>B. ovatus</i>           | -3.224       | 14.74              | 0.9994               | 104.26                       |
| <i>B. thetaiotaomicron</i> | -3.396       | 14.91              | 0.9992               | 97.00                        |
| <i>B. adolescentis</i>     | -3.858       | 18.57              | 0.9944               | 81.64                        |
| <i>B. hansenii</i>         | -3.522       | 13.03              | 0.9951               | 92.28                        |
| <i>C. difficile</i>        | -3.651       | 14.56              | 0.9991               | 87.89                        |
| <i>E. coli</i>             | -3.450       | 16.73              | 0.9986               | 94.92                        |
| <i>E. hallii</i>           | -3.545       | 18.61              | 0.9903               | 91.46                        |
| <i>F. prausnitzii</i>      | -3.171       | 17.01              | 0.9927               | 106.71                       |
| <i>R. gnavus</i>           | -3.263       | 15.98              | 0.9979               | 102.52                       |

**Table S1B**

| <b>Species</b>             | <b>Slope</b> | <b>Y-intercept</b> | <b>R<sup>2</sup></b> | <b>Primer efficiency (%)</b> |
|----------------------------|--------------|--------------------|----------------------|------------------------------|
| <i>B. dorei</i>            | -3.419       | 15.08              | 0.9888               | 96.10                        |
| <i>B. fragilis</i>         | -3.228       | 23.18              | 0.9777               | 104.07                       |
| <i>B. ovatus</i>           | -3.146       | 15.91              | 0.9919               | 107.90                       |
| <i>B. thetaiotaomicron</i> | -3.361       | 12.89              | 0.9890               | 98.39                        |
| <i>B. adolescentis</i>     | -3.266       | 16.05              | 0.9861               | 102.39                       |
| <i>B. hansenii</i>         | -3.475       | 13.87              | 0.9852               | 93.99                        |
| <i>C. difficile</i>        | -3.143       | 14.79              | 0.9945               | 108.05                       |
| <i>E. coli</i>             | -3.398       | 14.02              | 0.9822               | 96.92                        |
| <i>E. hallii</i>           | -3.536       | 14.23              | 0.9778               | 91.78                        |
| <i>F. prausnitzii</i>      | -3.324       | 15.16              | 0.9586               | 99.91                        |
| <i>R. gnavus</i>           | -3.230       | 15.03              | 0.9912               | 103.98                       |
