# Supplementary material for: Dissecting Individual Interactions between Pathogenic and Commensal Bacteria within a Multispecies Gut Microbial Community
Source: PubMed Central journal article supplement (PMC8546675; doi:10.1128/msphere.00013-21), 2021-03-24
Supplement: msphere.00013-21-st002.pdf [file msphere.00013-21-st002.pdf]

**Table S2**

| <b>Species</b>             | <b>Length (b)</b> | <b>Weight (ng)</b>      | <b>NCBI Reference</b> |
|----------------------------|-------------------|-------------------------|-----------------------|
| <i>B. dorei</i>            | 6079576           | 6.56 x 10 <sup>-6</sup> | GCF_000273035.1       |
| <i>B. fragilis</i>         | 5530115           | 5.97 x 10 <sup>-6</sup> | GCF_000025985.1       |
| <i>B. ovatus</i>           | 6549476           | 7.07 x 10 <sup>-6</sup> | GCF_000218325.1       |
| <i>B. thetaiotaomicron</i> | 6293399           | 6.79 x 10 <sup>-6</sup> | GCF_000011065.1       |
| <i>B. adolescentis</i>     | 2389110           | 2.58 x 10 <sup>-6</sup> | GCF_000154085.1       |
| <i>B. hansenii</i>         | 3065949           | 3.31 x 10 <sup>-6</sup> | GCF_002222595.2       |
| <i>C. difficile</i>        | 4191339           | 4.52 x 10 <sup>-6</sup> | GCF_000027105.1       |
| <i>E. coli</i>             | 5106156           | 5.51 x 10 <sup>-6</sup> | GCF_000159295.1       |
| <i>E. hallii</i>           | 3290996           | 3.55 x 10 <sup>-6</sup> | GCF_000173975.1       |
| <i>F. prausnitzii</i>      | 3090349           | 3.34 x 10 <sup>-6</sup> | GCF_000162015.1       |
| <i>R. gnavus</i>           | 3181861           | 3.43 x 10 <sup>-6</sup> | GCF_000507805.1       |
